# Supplementary material for: Investigation on copper–nickel co-doped anatase titania nanospheres as an efficient material for photocatalytic and photovoltaic applications
Source: Royal Society of Chemistry journal article supplement (doi:10.1039/d3nj02697c), 2023-01-01
Supplement: d3nj02697c1.pdf [file d3nj02697c1.pdf]

## Supplementary Information

### Study on copper-nickel co-doped anatase titania nanosphere as highly efficient photoanode material in photocatalytic and photovoltaic applications

T. Raguram<sup>a, b</sup>, K. S. Rajni<sup>b\*</sup>, E. Nandhakumar<sup>c</sup>, G. Kiruthiga<sup>d</sup>

<sup>a</sup> Department of Physics, Acharya Institute of Graduate Studies, Bangalore, Karnataka, 560 107, India

<sup>b</sup> Department of Sciences, Amrita School of Physical Sciences, Coimbatore, Amrita Vishwa Vidyapeetham, India

<sup>c</sup> Centre for Nonlinear Systems, Chennai Institute of Technology, Chennai 600069, Tamil Nadu, India

<sup>d</sup> Department of Physics, Avinashilingam Institute for Home Science and Higher Education for Women, Coimbatore, Tamil Nadu, 641 043, India

\*Corresponding author Email id: ks\_rajani@cb.amrita.edu

#### Figure

**Fig. S1** (a-c) EDS spectra and (d) Atomic % of Cu, Ni-co-doped TiO<sub>2</sub> nanospheres by sol-gel technique

**Fig. S2** Flow chart of Cu, Ni-co-doped TiO<sub>2</sub> nanospheres used as photoanodes and photocatalyst in DSSC and Photocatalytic activity and analyzing the characterization techniques

#### Tables

**Table S1** Microstructural parameters of Cu, Ni co-doped TiO<sub>2</sub> nanospheres by sol-gel technique

**Table S2** BET surface area, pore volume and pore diameter of Cu, Ni co-doped TiO<sub>2</sub> nanospheres by sol-gel technique

**Table S3** Pseudo first order kinetic parameters of CNT's photocatalysts against Rhodamine-B dye and degradation efficiencies

**Table S4** J-V parameters of fabricated DSSC using Cu, Ni co-doped TiO<sub>2</sub> photoanodes

**Table S5** EIS parameters of fabricated DSSC using Cu, Ni co-doped TiO<sub>2</sub> photoanodes

**Table S6** Dye degradation efficiency comparison of different doped TiO<sub>2</sub> nanospheres

**Table S7** Comparison of DSSC efficiency with different doped TiO<sub>2</sub> photoanodes

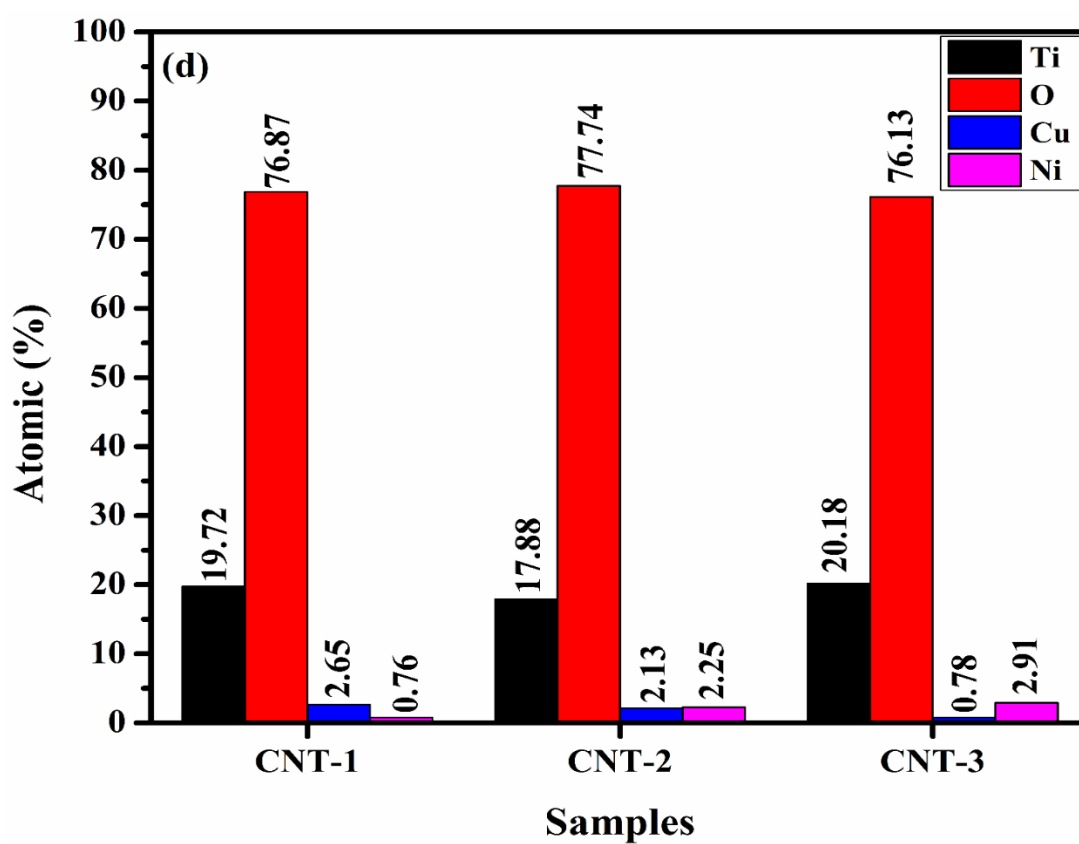

**Fig. S1** (a-c) EDS spectra and (d) Atomic % of Cu, Ni-co-doped TiO<sub>2</sub> nanospheres by sol-gel technique

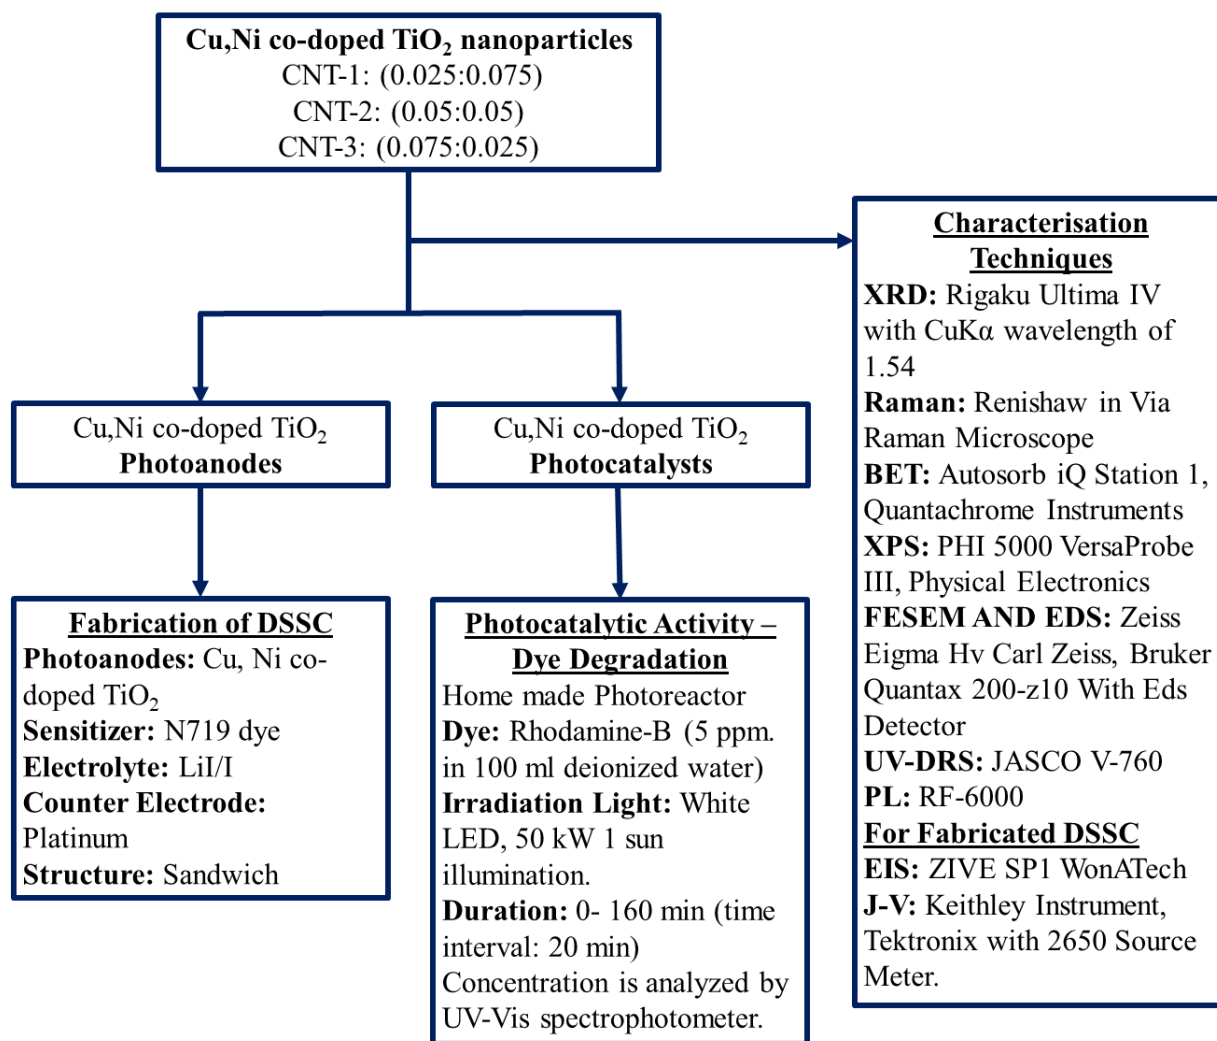

**Fig. S2** Flow chart of Cu, Ni-co-doped TiO<sub>2</sub> nanospheres used as photoanodes and photocatalyst in DSSC and Photocatalytic activity and analyzing the characterization techniques

**Table S1** Microstructural parameters of Cu, Ni co-doped TiO<sub>2</sub> nanospheres by sol-gel technique

| <b>Samples</b> | <b>Avg. Crystallite Size (nm)</b> | <b>Lattice Constants (Å)</b><br><b>a = 3.782, c = 9.502</b> | <b>Microstrain (10<sup>-6</sup>)</b> | <b>Volume (Å)<sup>3</sup></b> |
|----------------|-----------------------------------|-------------------------------------------------------------|--------------------------------------|-------------------------------|
| CNT-1          | 7.82                              | a = 3.791, c = 9.974                                        | 0.0047                               | 143.3431                      |
| CNT-2          | 7.57                              | a = 3.791, c = 9.923                                        | 0.0048                               | 142.6102                      |
| CNT-3          | 7.80                              | a = 3.793, c = 9.953                                        | 0.0047                               | 143.1923                      |

**Table S2** BET surface area, pore volume and pore diameter of Cu, Ni co-doped TiO<sub>2</sub> nanospheres by sol-gel technique

| <b>Samples</b> | <b>BET surface area (m<sup>2</sup> g<sup>-1</sup>)</b> | <b>Pore Volume (cc/g)</b> | <b>Pore Diameter (Å)</b> |
|----------------|--------------------------------------------------------|---------------------------|--------------------------|
| CNT-1          | 241.662                                                | 0.200                     | 34.1600                  |
| CNT-2          | 314.984                                                | 0.466                     | 29.5560                  |
| CNT-3          | 195.939                                                | 0.290                     | 30.5760                  |

**Table S3** Pseudo first order kinetic parameters of CNT's photocatalysts against Rhodamine-B dye and degradation efficiencies

| <b>Samples</b> | <b>Pseudo first order Rate constant k (min<sup>-1</sup>)</b> | <b>Regression Coefficient (R<sup>2</sup>)</b> | <b>Half-life degradation time (t<sub>1/2</sub>) (min)</b> | <b>Degradation efficiencies (%)</b> |
|----------------|--------------------------------------------------------------|-----------------------------------------------|-----------------------------------------------------------|-------------------------------------|
| CNT-1          | 0.0289                                                       | 0.8747                                        | 23.9792                                                   | 82.8021                             |
| CNT-2          | 0.0471                                                       | 0.9912                                        | 14.7133                                                   | 99.0833                             |
| CNT-3          | 0.0308                                                       | 0.9812                                        | 22.5000                                                   | 83.5864                             |

**Table S4** J-V parameters of fabricated DSSC using Cu, Ni co-doped TiO<sub>2</sub> photoanodes

| <b>Samples</b> | <b>V<sub>oc</sub> (V)</b> | <b>J<sub>sc</sub> (mA/cm<sup>2</sup>)</b> | <b>FF</b> | <b>Efficiency η (%)</b> |
|----------------|---------------------------|-------------------------------------------|-----------|-------------------------|
| CNT-1          | 1.1426                    | 6.5638                                    | 0.6652    | 4.9888                  |
| CNT-2          | 1.2313                    | 7.0086                                    | 0.6565    | 5.6653                  |
| CNT-3          | 0.9876                    | 6.3457                                    | 0.6219    | 3.8974                  |

**Table S5** EIS parameters of fabricated DSSC using Cu, Ni co-doped TiO<sub>2</sub> photoanodes

| <b>Samples</b> | <b>R<sub>s</sub><br/>(<math>\Omega</math>)</b> | <b>R<sub>ct1</sub><br/>(<math>\Omega</math>)</b> | <b>R<sub>ct2</sub><br/>(<math>\Omega</math>)</b> | <b>C<sub><math>\mu</math></sub><br/>(F)</b> | <b><math>\tau_e</math><br/>(ms)</b> | <b><math>\tau_t</math><br/>(ms)</b> | <b><math>\phi_c</math><br/>(%)</b> |
|----------------|------------------------------------------------|--------------------------------------------------|--------------------------------------------------|---------------------------------------------|-------------------------------------|-------------------------------------|------------------------------------|
| CNT-1          | 5.2031                                         | 4.0271                                           | 168.4000                                         | 10.3630                                     | 0.2744                              | 0.4173                              | 0.9963                             |
| CNT-2          | 5.1810                                         | 4.8300                                           | 043.0500                                         | 19.3706                                     | 0.2802                              | 0.9356                              | 0.9966                             |
| CNT-3          | 5.0820                                         | 4.6289                                           | 182.9000                                         | 07.4631                                     | 0.1071                              | 0.9255                              | 0.9961                             |

**Table S6** Dye degradation efficiency comparison of different doped TiO<sub>2</sub> nanospheres

| <b>Samples</b>                                                             | <b>Dye</b>  | <b>Light sources</b> | <b>Time</b> | <b>Dye Degradation (%)</b> | <b>Reference</b>    |
|----------------------------------------------------------------------------|-------------|----------------------|-------------|----------------------------|---------------------|
| Ti <sup>3+</sup> /N co-doped TiO <sub>2</sub>                              | Rhodamine-B | 300 W Xenon lamp     | 60 min      | 97.8                       | [60]                |
| Porphyrin functionalized UiO-66 and kegging unit co-doped TiO <sub>2</sub> | Rhodamine-B | 300 W Xe lamp        | 120 min     | 98.6                       | [61]                |
| Fe-Co-S co-doped TiO <sub>2</sub>                                          | Congo red   | Sunlight             | 70 min      | 99.3                       | [62]                |
| Zr-Ag co-doped TiO <sub>2</sub> nanofibers                                 | Congo red   | 300-W Xe lamp        | 120 min     | 99.3                       | [63]                |
| Cu/Ni co-doped TiO <sub>2</sub> nanospheres (CNT-2)                        | Rhodamine-B | White LED, 50 kW     | 120 min     | 99.08                      | <b>Present work</b> |

**Table S7** Comparison of DSSC efficiency with different doped TiO<sub>2</sub> photoanodes

| <b>Samples</b>                                                               | <b>V<sub>oc</sub></b><br><b>(V)</b> | <b>J<sub>sc</sub></b><br><b>(mA/cm<sup>2</sup>)</b> | <b>FF</b> | <b>Efficiency</b><br><b>η (%)</b> | <b>Reference</b>    |
|------------------------------------------------------------------------------|-------------------------------------|-----------------------------------------------------|-----------|-----------------------------------|---------------------|
| Ca-doped TiO <sub>2</sub> nanorods                                           | 0.63                                | 7.3                                                 | 0.69      | 2.32                              | [54]                |
| Carbonate-doped mesoporous TiO <sub>2</sub> nanospheres                      | 0.73                                | 12.16                                               | 0.61      | 5.4                               | [55]                |
| Nickel-Zinc co-doped TiO <sub>2</sub>                                        | 0.694                               | 1.436                                               | 0.459     | 0.76                              | [56]                |
| Cobalt-rGO co-doped TiO <sub>2</sub>                                         | 0.618                               | 12.83                                               | 0.593     | 5.24                              | [57]                |
| Ho <sup>3+</sup> -Yb <sup>3+</sup> -F-Tri doped TiO <sub>2</sub> nanospheres | 0.76                                | 9.45                                                | 0.69      | 4.96                              | [58]                |
| TiO <sub>2</sub> @Ag nanospheres                                             | 0.69                                | 11.90                                               | 0.64      | 5.27                              | [59]                |
| Cu/Ni co-doped TiO <sub>2</sub> nanospheres (CNT-2)                          | 1.23                                | 7.00                                                | 0.65      | 5.66                              | <b>Present work</b> |
